# Supplementary material
Source: PubMed Central journal article supplement (PMC5268130)
Supplement: NIHMS835135-supplement-supplemental_tables.pdf [file NIHMS835135-supplement-supplemental_tables.pdf]

## SUPPLEMENTAL MATERIAL

### Renal Dysfunction is Associated with Post-Stroke Discharge Disposition and In-Hospital Mortality: Findings from GWTG

Nada El Husseini, Gregg C. Fonarow, Eric E. Smith, Christine Ju, Lee H. Schwamm, Adrian F. Hernandez, Phillip J. Schulte, Ying Xian, Larry B. Goldstein

**Table I.** Hospital characteristics by eGFR level

| Variable                                                                                          | Overall<br>(N=232236)      | GFR ≥ 60<br>(N=109913)     | GFR 45-59<br>(N=61719)     | GFR 30-44<br>(N =39201)    | GFR<br>15-29<br>(N=131<br>18) | GFR < 15<br>(N =1700)      | On<br>Dialysis<br>(N=6585) | P-Value |
|---------------------------------------------------------------------------------------------------|----------------------------|----------------------------|----------------------------|----------------------------|-------------------------------|----------------------------|----------------------------|---------|
| Region, %                                                                                         |                            |                            |                            |                            |                               |                            |                            | <0.0001 |
| Northeast                                                                                         | 27.9                       | 28.2                       | 27.8                       | 27.9                       | 27.5                          | 26.2                       | 26.4                       |         |
| Midwest                                                                                           | 20.7                       | 20.2                       | 21.2                       | 21.4                       | 21.1                          | 20.5                       | 20.5                       |         |
| South                                                                                             | 36.8                       | 36.4                       | 36.9                       | 37.0                       | 37.9                          | 37.4                       | 39.4                       |         |
| West                                                                                              | 14.5                       | 15.2                       | 14.1                       | 13.7                       | 13.5                          | 15.9                       | 13.7                       |         |
| Teaching Hospital,<br>%                                                                           | 54.4                       | 55.9                       | 53.0                       | 52.4                       | 53.0                          | 53.2                       | 57.2                       | <0.0001 |
| Number of beds,<br>median (25 <sup>th</sup> -75 <sup>th</sup><br>P*)                              | 342<br>(235-507)           | 348<br>(240-514)           | 338<br>(233-501)           | 333<br>(230-485)           | 337<br>(230-<br>493)          | 333<br>(231-504)           | 358<br>(252-542)           | <0.0001 |
| Rural Location, %                                                                                 | 5.3                        | 5.1                        | 5.3                        | 5.5                        | 6.0                           | 5.5                        | 3.6                        | <0.0001 |
| Primary stroke<br>center status, %                                                                | 50.0                       | 49.9                       | 50.6                       | 49.7                       | 49.6                          | 50.7                       | 49.8                       | 0.0383  |
| Annual volume of<br>ischemic stroke<br>admission median<br>(25 <sup>th</sup> -75 <sup>th</sup> P) | 206.0<br>(140.2-<br>301.9) | 207.4<br>(141.1-<br>306.7) | 204.7<br>(139.1-<br>301.9) | 197.9<br>(137.9-<br>298.7) | 202.4<br>(137.3-<br>300.2)    | 197.5<br>(132.4-<br>299.8) | 212.0<br>(145.4-<br>315.4) | <0.0001 |
| Annual volume of<br>tPA administrations<br>median (25 <sup>th</sup> -75 <sup>th</sup> P)          | 14.0<br>(8.1-24.0)         | 14.1<br>(8.4-24.4)         | 14.0<br>(8.1-23.9)         | 13.7<br>(7.8-23.8)         | 13.9<br>(7.8-<br>23.5)        | 14.3<br>(7.5-23.8)         | 14.8<br>(8.5-24.1)         | <0.0001 |

\*P: percentile

**Table II.** Association of demographic and clinical factors and in-hospital mortality or hospice for patients admitted with ischemic stroke by eGFR level

|     | Factor                                            | Unadjusted OR,<br>95%CI | P-<br>value | Interactio<br>n P | Adjusted OR<br>95% CI | P-<br>value | Interact<br>ion P |
|-----|---------------------------------------------------|-------------------------|-------------|-------------------|-----------------------|-------------|-------------------|
| Age | Overall interaction between age<br>and eGFR level |                         |             | <.0001            |                       |             | 0.0056            |
|     | eGFR≥60: increase per 5 years                     | 1.48( 1.46, 1.50)       | <.0001      |                   | 1.30( 1.27, 1.32)     | <.0001      |                   |

|                       | <b>Factor</b>                                                  | <b>Unadjusted OR,<br/>95%CI</b> | <b>P-<br/>value</b> | <b>Interactio<br/>n P</b> | <b>Adjusted OR<br/>95% CI</b> | <b>P-<br/>value</b> | <b>Interact<br/>ion P</b> |
|-----------------------|----------------------------------------------------------------|---------------------------------|---------------------|---------------------------|-------------------------------|---------------------|---------------------------|
|                       | eGFR 45-59: increase per 5 years                               | 1.47( 1.45, 1.50)               | <.0001              |                           | 1.29( 1.26, 1.32)             | <.0001              |                           |
|                       | eGFR 30-44: increase per 5 years                               | 1.40( 1.37, 1.43)               | <.0001              |                           | 1.28( 1.24, 1.32)             | <.0001              |                           |
|                       | eGFR 15-29: increase per 5 years                               | 1.28( 1.25, 1.32)               | <.0001              |                           | 1.21( 1.16, 1.26)             | <.0001              |                           |
|                       | GFR<15: increase per 5 years                                   | 1.29( 1.20, 1.38)               | <.0001              |                           | 1.29( 1.14, 1.46)             | <.0001              |                           |
|                       | Dialysis: increase per 5 years                                 | 1.26( 1.20, 1.32)               | <.0001              |                           | 1.16( 1.08, 1.25)             | <.0001              |                           |
| Previous Stroke/TIA   | Overall interaction between previous stroke/TIA and eGFR level |                                 |                     | <.0001                    |                               |                     | 0.0198                    |
|                       | eGFR $\geq$ 60                                                 | 1.13( 1.08, 1.19)               | <.0001              |                           | 0.99( 0.93, 1.05)             | 0.7681              |                           |
|                       | eGFR 45-59                                                     | 1.06( 1.00, 1.12)               | 0.0380              |                           | 1.00( 0.92, 1.07)             | 0.8995              |                           |
|                       | eGFR 30-44                                                     | 0.98( 0.93, 1.04)               | 0.5843              |                           | 0.96( 0.87, 1.05)             | 0.3565              |                           |
|                       | eGFR 15-29                                                     | 0.83( 0.75, 0.91)               | 0.0001              |                           | 0.81( 0.70, 0.95)             | 0.0076              |                           |
|                       | GFR<15                                                         | 1.10( 0.87, 1.39)               | 0.4093              |                           | 0.93( 0.60, 1.45)             | 0.7535              |                           |
|                       | Dialysis                                                       | 0.83( 0.71, 0.97)               | 0.0196              |                           | 0.69( 0.54, 0.88)             | 0.0027              |                           |
| Admission Systolic BP | Overall interaction between SBP and eGFR level                 |                                 |                     | <.0001                    |                               |                     | 0.0007                    |
|                       | eGFR $\geq$ 60: Per 5 mmHg up to 150 mmHg                      | 0.93( 0.92, 0.94)               | <.0001              |                           | 0.95( 0.94, 0.96)             | <.0001              |                           |
|                       | eGFR $\geq$ 60: per 5 mmHg above 150 mmHg                      | 1.01( 1.01, 1.02)               | <.0001              |                           | 1.03( 1.02, 1.03)             | <.0001              |                           |
|                       | eGFR 45-59: Per 5 mmHg up to 150 mmHg                          | 0.95( 0.94, 0.96)               | <.0001              |                           | 0.97( 0.96, 0.98)             | <.0001              |                           |
|                       | eGFR 45-59: per 5 mmHg above 150 mmHg                          | 1.02( 1.01, 1.02)               | <.0001              |                           | 1.02( 1.01, 1.03)             | <.0001              |                           |
|                       | eGFR 30-44: Per 5 mmHg up to 150 mmHg                          | 0.94( 0.93, 0.95)               | <.0001              |                           | 0.94( 0.92, 0.95)             | <.0001              |                           |
|                       | eGFR 30-44: per 5 mmHg above 150 mmHg                          | 1.02( 1.02, 1.03)               | <.0001              |                           | 1.03( 1.02, 1.04)             | <.0001              |                           |
|                       | eGFR 15-29: Per 5 mmHg up to 150 mmHg                          | 0.94( 0.93, 0.96)               | <.0001              |                           | 0.94( 0.92, 0.96)             | <.0001              |                           |
|                       | eGFR 15-29: per 5 mmHg above 150 mmHg                          | 1.00( 0.99, 1.01)               | 0.9074              |                           | 1.01( 0.99, 1.03)             | 0.3438              |                           |
|                       | GFR<15: Per 5 mmHg up to 150 mmHg                              | 0.93( 0.91, 0.96)               | <.0001              |                           | 0.93( 0.88, 0.98)             | 0.0079              |                           |

|                   | <b>Factor</b>                                              | <b>Unadjusted OR,<br/>95%CI</b> | <b>P-<br/>value</b> | <b>Interactio<br/>n P</b> | <b>Adjusted OR<br/>95% CI</b> | <b>P-<br/>value</b> | <b>Interact<br/>ion P</b> |
|-------------------|------------------------------------------------------------|---------------------------------|---------------------|---------------------------|-------------------------------|---------------------|---------------------------|
|                   | GFR<15: per 5 mmHg above 150 mmHg                          | 1.00( 0.97, 1.03)               | 0.9622              |                           | 1.00( 0.94, 1.06)             | 0.9632              |                           |
|                   | Dialysis: Per 5 mmHg up to 150 mmHg                        | 0.92( 0.90, 0.94)               | <.0001              |                           | 0.92( 0.89, 0.95)             | <.0001              |                           |
|                   | Dialysis: per 5 mmHg above 150 mmHg                        | 1.00( 0.98, 1.02)               | 0.8439              |                           | 1.01( 0.98, 1.04)             | 0.4988              |                           |
| Admission Glucose | Overall interaction between glucose and eGFR level         |                                 |                     | <.0001                    |                               |                     | 0.0247                    |
|                   | eGFR≥60: per 5 mg/dL up to 100 mg/dL                       | 1.00( 0.98, 1.02)               | 0.7549              |                           | 1.00( 0.97, 1.03)             | 0.9903              |                           |
|                   | eGFR≥60: per 5 mg/dL increase between 100 and 150 mg/dL    | 1.08( 1.08, 1.09)               | <.0001              |                           | 1.06( 1.05, 1.07)             | <.0001              |                           |
|                   | eGFR≥60: per 5 mg/dL above 150 mg/dL                       | 0.99( 0.98, 0.99)               | <.0001              |                           | 1.00( 1.00, 1.01)             | 0.1503              |                           |
|                   | eGFR 45-59: per 5 mg/dL up to 100 mg/dL                    | 1.00( 0.98, 1.03)               | 0.7928              |                           | 1.01( 0.97, 1.05)             | 0.5632              |                           |
|                   | eGFR 45-59: per 5 mg/dL increase between 100 and 150 mg/dL | 1.08( 1.07, 1.09)               | <.0001              |                           | 1.05( 1.04, 1.06)             | <.0001              |                           |
|                   | eGFR 45-59: per 5 mg/dL above 150 mg/dL                    | 0.99( 0.99, 1.00)               | 0.0002              |                           | 1.01( 1.00, 1.01)             | 0.0003              |                           |
|                   | eGFR 30-44: per 5 mg/dL up to 100 mg/dL                    | 1.01( 0.98, 1.04)               | 0.4962              |                           | 0.99( 0.95, 1.03)             | 0.6256              |                           |
|                   | eGFR 30-44: per 5 mg/dL increase between 100 and 150 mg/dL | 1.07( 1.06, 1.08)               | <.0001              |                           | 1.06( 1.04, 1.07)             | <.0001              |                           |
|                   | eGFR 30-44: per 5 mg/dL above 150 mg/dL                    | 1.00( 0.99, 1.00)               | 0.0144              |                           | 1.00( 1.00, 1.01)             | 0.7784              |                           |
|                   | eGFR 15-29: per 5 mg/dL up to 100 mg/dL                    | 0.98( 0.94, 1.01)               | 0.2286              |                           | 0.94( 0.89, 1.00)             | 0.0358              |                           |
|                   | eGFR 15-29: per 5 mg/dL increase between 100 and 150 mg/dL | 1.07( 1.05, 1.08)               | <.0001              |                           | 1.06( 1.04, 1.09)             | <.0001              |                           |
|                   | eGFR 15-29: per 5 mg/dL above 150 mg/dL                    | 1.00( 1.00, 1.00)               | 0.5707              |                           | 1.01( 1.00, 1.02)             | 0.0054              |                           |
|                   | GFR<15: per 5 mg/dL up to 100 mg/dL                        | 0.97( 0.90, 1.04)               | 0.3517              |                           | 0.98( 0.86, 1.12)             | 0.7964              |                           |
|                   | GFR<15: per 5 mg/dL increase between 100 and 150 mg/dL     | 1.08( 1.04, 1.11)               | <.0001              |                           | 1.05( 0.99, 1.11)             | 0.0782              |                           |

|                                          | Factor                                                   | Unadjusted OR,<br>95% CI | P-<br>value | Interactio<br>n P | Adjusted OR<br>95% CI | P-<br>value | Interact<br>ion P |
|------------------------------------------|----------------------------------------------------------|--------------------------|-------------|-------------------|-----------------------|-------------|-------------------|
|                                          | GFR<15: per 5 mg/dL above 150 mg/dL                      | 1.00( 1.00, 1.01)        | 0.2743      |                   | 1.01( 0.99, 1.02)     | 0.4510      |                   |
|                                          | Dialysis: per 5 mg/dL up to 100 mg/dL                    | 0.96( 0.92, 1.01)        | 0.0837      |                   | 0.88( 0.82, 0.94)     | 0.0003      |                   |
|                                          | Dialysis: per 5 mg/dL increase between 100 and 150 mg/dL | 1.04( 1.02, 1.07)        | 0.0003      |                   | 1.06( 1.02, 1.10)     | 0.0013      |                   |
|                                          | Dialysis: per 5 mg/dL above 150 mg/dL                    | 0.99( 0.99, 1.00)        | 0.0452      |                   | 1.00( 0.99, 1.01)     | 0.6715      |                   |
| NIHSS Score                              | Overall interaction between NIHSS and eGFR level         |                          |             | <.0001            |                       |             | 0.0008            |
|                                          | eGFR≥60: increase per 5 points                           | 2.08( 2.04, 2.11)        | <.0001      |                   | 1.99( 1.96, 2.03)     | <.0001      |                   |
|                                          | eGFR 45-59: increase per 5 points                        | 2.03( 1.99, 2.08)        | <.0001      |                   | 1.96( 1.92, 2.01)     | <.0001      |                   |
|                                          | eGFR 30-44: increase per 5 points                        | 1.99( 1.94, 2.04)        | <.0001      |                   | 1.94( 1.89, 1.99)     | <.0001      |                   |
|                                          | eGFR 15-29: increase per 5 points                        | 1.86( 1.80, 1.93)        | <.0001      |                   | 1.84( 1.78, 1.91)     | <.0001      |                   |
|                                          | GFR<15: increase per 5 points                            | 1.72( 1.57, 1.90)        | <.0001      |                   | 1.70( 1.54, 1.87)     | <.0001      |                   |
|                                          | Dialysis: increase per 5 points                          | 1.91( 1.80, 2.02)        | <.0001      |                   | 1.89( 1.78, 2.01)     | <.0001      |                   |
| Hospital:<br>Teaching vs.<br>No Teaching | Overall interaction between teaching site and eGFR level |                          |             | 0.1292            |                       |             | 0.0123            |
|                                          | eGFR≥60                                                  | 1.09( 1.03, 1.15)        | 0.0034      |                   | 1.11( 1.02, 1.20)     | 0.0117      |                   |
|                                          | eGFR 45-59                                               | 1.10( 1.03, 1.18)        | 0.0027      |                   | 1.00( 0.92, 1.10)     | 0.9442      |                   |
|                                          | eGFR 30-44                                               | 1.14( 1.06, 1.21)        | 0.0001      |                   | 1.07( 0.96, 1.18)     | 0.2136      |                   |
|                                          | eGFR 15-29                                               | 0.98( 0.90, 1.07)        | 0.7099      |                   | 0.93( 0.80, 1.09)     | 0.3812      |                   |
|                                          | GFR<15                                                   | 1.05( 0.84, 1.31)        | 0.6611      |                   | 0.96( 0.65, 1.43)     | 0.8468      |                   |
|                                          | Dialysis                                                 | 1.04 ( 0.89, 1.21)       | 0.6411      |                   | 0.77( 0.61, 0.97)     | 0.0265      |                   |

**Table III.** Association of demographic and clinical factors with discharge home for patients admitted with ischemic stroke by eGFR level

|  | Factor | Unadjusted OR<br>95% CI | P-<br>value | Interacti<br>on P | Adjusted OR<br>95% CI | P-value | Interaction<br>P |
|--|--------|-------------------------|-------------|-------------------|-----------------------|---------|------------------|
|--|--------|-------------------------|-------------|-------------------|-----------------------|---------|------------------|

|      | <b>Factor</b>                                   | <b>Unadjusted OR<br/>95% CI</b> | <b>P-<br/>value</b> | <b>Interacti<br/>on P</b> | <b>Adjusted OR<br/>95% CI</b> | <b>P-value</b> | <b>Interaction<br/>P</b> |
|------|-------------------------------------------------|---------------------------------|---------------------|---------------------------|-------------------------------|----------------|--------------------------|
| Age  | Overall interaction between age and eGFR level  |                                 |                     | <.0001                    |                               |                | 0.0013                   |
|      | eGFR $\geq$ 60: increase per 5 years            | 0.72 ( 0.71, 0.72)              | <.0001              |                           | 0.76 ( 0.75, 0.77)            | <.0001         |                          |
|      | eGFR 45-59: increase per 5 years                | 0.71 ( 0.70, 0.72)              | <.0001              |                           | 0.75 ( 0.74, 0.76)            | <.0001         |                          |
|      | eGFR 30-44: increase per 5 years                | 0.74 ( 0.73, 0.75)              | <.0001              |                           | 0.77 ( 0.76, 0.79)            | <.0001         |                          |
|      | eGFR 15-29: increase per 5 years                | 0.77 ( 0.75, 0.78)              | <.0001              |                           | 0.79 ( 0.76, 0.82)            | <.0001         |                          |
|      | eGFR<15: increase per 5 years                   | 0.75 ( 0.70, 0.80)              | <.0001              |                           | 0.79 (0.71, 0.87)             | <.0001         |                          |
|      | Dialysis: increase per 5 years                  | 0.84 ( 0.81, 0.87)              | <.0001              |                           | 0.83 ( 0.79, 0.88)            | <.0001         |                          |
| Sex  | Overall interaction between Sex and eGFR level  |                                 |                     | <.0001                    |                               |                | 0.0209                   |
|      | eGFR $\geq$ 60: Female vs. Male                 | 0.70 ( 0.68, 0.72)              | <.0001              |                           | 0.85 ( 0.82, 0.88)            | <.0001         |                          |
|      | eGFR 45-59: Female vs. Male                     | 0.59 ( 0.57, 0.61)              | <.0001              |                           | 0.79 ( 0.75, 0.83)            | <.0001         |                          |
|      | eGFR 30-44: Female vs. Male                     | 0.74 ( 0.71, 0.78)              | <.0001              |                           | 0.88 ( 0.82, 0.94)            | 0.0001         |                          |
|      | eGFR 15-29: Female vs. Male                     | 0.69 ( 0.64, 0.75)              | <.0001              |                           | 0.75 ( 0.67, 0.85)            | <.0001         |                          |
|      | eGFR<15: Female vs. Male                        | 0.73 ( 0.58, 0.93)              | 0.0089              |                           | 0.87 ( 0.62, 1.22)            | 0.4201         |                          |
|      | Dialysis: Female vs. Male                       | 0.77 ( 0.70, 0.85)              | <.0001              |                           | 0.94 ( 0.81, 1.10)            | 0.4701         |                          |
| Race | Overall interaction between race and eGFR level |                                 |                     | <.0001                    |                               |                | <.0001                   |
|      | eGFR $\geq$ 60: Nonwhite vs. White              | 0.94 ( 0.91, 0.97)              | 0.0001              |                           | 0.91 ( 0.87, 0.96)            | 0.0002         |                          |
|      | eGFR 45-59: Nonwhite vs. White                  | 1.05 ( 1.01, 1.10)              | 0.0227              |                           | 1.02 ( 0.95, 1.09)            | 0.5912         |                          |
|      | eGFR 30-44: Nonwhite vs. White                  | 1.08 ( 1.02, 1.14)              | 0.0096              |                           | 1.11 ( 1.01, 1.21)            | 0.0275         |                          |
|      | eGFR 15-29: Nonwhite vs. White                  | 1.21 ( 1.11, 1.33)              | <.0001              |                           | 1.20 ( 1.03, 1.39)            | 0.0165         |                          |
|      | eGFR<15: Nonwhite vs. White                     | 1.35 ( 1.05, 1.74)              | 0.0213              |                           | 1.27 ( 0.86, 1.86)            | 0.2260         |                          |

|              | <b>Factor</b>                                           | <b>Unadjusted OR<br/>95% CI</b> | <b>P-<br/>value</b> | <b>Interacti<br/>on P</b> | <b>Adjusted OR<br/>95% CI</b> | <b>P-value</b> | <b>Interaction<br/>P</b> |
|--------------|---------------------------------------------------------|---------------------------------|---------------------|---------------------------|-------------------------------|----------------|--------------------------|
|              | Dialysis: Nonwhite vs. White                            | 1.01 ( 0.92, 1.12)              | 0.8294              |                           | 0.98 ( 0.84, 1.16)            | 0.8463         |                          |
| Hypertension | Overall interaction between hypertension and eGFR level |                                 |                     | <.0001                    |                               |                | 0.0387                   |
|              | eGFR $\geq$ 60                                          | 0.86 ( 0.84, 0.89)              | <.0001              |                           | 0.91 ( 0.87, 0.94)            | <.0001         |                          |
|              | eGFR 45-59                                              | 0.96 ( 0.92, 1.00)              | 0.0392              |                           | 0.92 ( 0.87, 0.98)            | 0.0109         |                          |
|              | eGFR 30-44                                              | 1.13 ( 1.06, 1.19)              | <.0001              |                           | 1.04 ( 0.95, 1.13)            | 0.4162         |                          |
|              | eGFR 15-29                                              | 1.19 ( 1.07, 1.33)              | 0.0021              |                           | 1.05 ( 0.88, 1.24)            | 0.5803         |                          |
|              | eGFR<15                                                 | 1.23 ( 0.90, 1.67)              | 0.1933              |                           | 1.01 ( 0.65, 1.57)            | 0.9654         |                          |
|              | Dialysis                                                | 1.18 ( 1.01, 1.37)              | 0.0394              |                           | 1.06 ( 0.84, 1.33)            | 0.6219         |                          |
| Dyslipidemia | Overall interaction between dyslipidemia and eGFR level |                                 |                     | 0.0002                    |                               |                | 0.0066                   |
|              | eGFR $\geq$ 60                                          | 1.32 ( 1.29, 1.35)              | <.0001              |                           | 1.20 ( 1.16, 1.25)            | <.0001         |                          |
|              | eGFR 45-59                                              | 1.35 ( 1.31, 1.40)              | <.0001              |                           | 1.15 ( 1.09, 1.20)            | <.0001         |                          |
|              | eGFR 30-44                                              | 1.41 ( 1.35, 1.48)              | <.0001              |                           | 1.16 ( 1.08, 1.24)            | <.0001         |                          |
|              | eGFR 15-29                                              | 1.32 ( 1.23, 1.43)              | <.0001              |                           | 1.04 ( 0.93, 1.17)            | 0.4755         |                          |
|              | eGFR<15                                                 | 1.56 ( 1.24, 1.96)              | 0.0001              |                           | 1.47 ( 1.03, 2.08)            | 0.0337         |                          |
|              | Dialysis                                                | 1.10 ( 1.00, 1.21)              | 0.0588              |                           | 0.93 ( 0.80, 1.08)            | 0.3342         |                          |
| NIHSS Score  | Overall interaction between NIHSS and eGFR level        |                                 |                     | <.0001                    |                               |                | 0.0003                   |
|              | eGFR $\geq$ 60: increase per 5 points                   | 0.41 ( 0.40, 0.42)              | <.0001              |                           | 0.42 ( 0.41, 0.43)            | <.0001         |                          |
|              | eGFR 45-59: increase per 5 points                       | 0.42 ( 0.41, 0.44)              | <.0001              |                           | 0.44 ( 0.42, 0.45)            | <.0001         |                          |
|              | eGFR 30-44: increase per 5 points                       | 0.43 ( 0.42, 0.45)              | <.0001              |                           | 0.44 ( 0.43, 0.46)            | <.0001         |                          |
|              | eGFR 15-29: increase per 5 points                       | 0.45 ( 0.42, 0.48)              | <.0001              |                           | 0.46 ( 0.43, 0.49)            | <.0001         |                          |
|              | eGFR<15: increase per 5 ypoints                         | 0.42 ( 0.34, 0.51)              | <.0001              |                           | 0.44 ( 0.36, 0.54)            | <.0001         |                          |
|              | Dialysis: increase per 5 points                         | 0.51 ( 0.46, 0.55)              | <.0001              |                           | 0.51 ( 0.47, 0.56)            | <.0001         |                          |

|                                            | <b>Factor</b>                                                            | <b>Unadjusted OR<br/>95% CI</b> | <b>P-<br/>value</b> | <b>Interacti<br/>on P</b> | <b>Adjusted OR<br/>95% CI</b> | <b>P-value</b> | <b>Interaction<br/>P</b> |
|--------------------------------------------|--------------------------------------------------------------------------|---------------------------------|---------------------|---------------------------|-------------------------------|----------------|--------------------------|
| Independent Ambulatory Status at Admission | Overall interaction between independent ambulatory status and eGFR level |                                 |                     | <.0001                    |                               |                | 0.0127                   |
|                                            | eGFR $\geq$ 60                                                           | 6.70 ( 6.44, 6.97)              | <.0001              |                           | 3.33 ( 3.17, 3.51)            | <.0001         |                          |
|                                            | eGFR 45-59                                                               | 6.80 ( 6.49, 7.13)              | <.0001              |                           | 3.34 ( 3.15, 3.55)            | <.0001         |                          |
|                                            | eGFR 30-44                                                               | 6.27 ( 5.94, 6.63)              | <.0001              |                           | 3.08 ( 2.86, 3.32)            | <.0001         |                          |
|                                            | eGFR 15-29                                                               | 5.77 ( 5.23, 6.37)              | <.0001              |                           | 2.86 ( 2.50, 3.27)            | <.0001         |                          |
|                                            | eGFR<15                                                                  | 6.88 ( 5.10, 9.27)              | <.0001              |                           | 4.30 ( 2.79, 6.61)            | <.0001         |                          |
|                                            | Dialysis                                                                 | 4.97 ( 4.37, 5.66)              | <.0001              |                           | 2.66 ( 2.19, 3.23)            | <.0001         |                          |
